# Supplementary material for: The neglected nano-specific toxicity of ZnO nanoparticles in the yeast Saccharomyces cerevisiae
Source: PubMed Central journal article supplement (PMC4837412; doi:10.1038/srep24839), 2016-04-20
Supplement: srep24839-s1.pdf [file srep24839-s1.pdf]

## Supporting information

### The neglected nano-specific toxicity of ZnO nanoparticles in the yeast *Saccharomyces cerevisiae*

Weicheng Zhang,<sup>a</sup> Shaopan Bao,<sup>a, b</sup> and Tao Fang<sup>\*a</sup>

**Table S1** The information provided for ZnO NPs' size and genotype of yeast strains, zeta potential and hydrodynamic diameter of ZnO particles of at 1 and 6 h time points.

| Particles                           | Size (nm) <sup>b</sup>                                                                                           | Hydrodynamic diameter <sup>c</sup> (nm) |                    | Zeta potential <sup>c</sup> (eV) |                  |
|-------------------------------------|------------------------------------------------------------------------------------------------------------------|-----------------------------------------|--------------------|----------------------------------|------------------|
|                                     |                                                                                                                  | 1 h                                     | 6 h                | 1 h                              | 6 h              |
| Nano ZnO (30 mg/L)                  | 20                                                                                                               | 790.533 (±157.752)                      | 1883.000 (±64.967) | 25.033 (±0.306)                  | 23.400 (±0.173)  |
| Nano ZnO (300 mg/L)                 | 20                                                                                                               | 443.512 (±24.962)                       | 601.312 (±34.837)  | 23.133 (±0.814)                  | 25.033 (±0.569)  |
| Bulk ZnO (30 mg/L)                  |                                                                                                                  | 727.667 (±19.072)                       | 723.733 (±23.599)  | -18.067 (±0.404)                 | -17.833 (±0.751) |
| Bulk ZnO (300 mg/L)                 |                                                                                                                  | 762.934 (±11.314)                       | 1034.667 (±16.660) | -11.733 (±0.643)                 | -9.933 (±0.513)  |
| Strains <sup>a</sup>                | Genotype                                                                                                         |                                         |                    |                                  |                  |
| Wild type (BY4741)                  | <b>MATa</b> <i>his3Δ0 leu2Δ0 met15Δ0 ura3Δ0</i>                                                                  |                                         |                    | -40.433 (±0.569)                 | -28.5 (±3.111)   |
| <i>yap1</i> mutant ( <i>yap1Δ</i> ) | <b>MATa</b> <i>his3Δ0 leu2Δ0 met15Δ0 ura3Δ0 yap1Δ::hisG</i>                                                      |                                         |                    | -34.400 (±1.587)                 | -30.15 (±0.778)  |
| Quadruple mutant (4Δ)               | <b>MATa</b> <i>his3Δ0 leu2Δ0 met15Δ0 ura3Δ0 snq2Δ::KanMX, pdr5Δ::LEU2, cwp1Δ::hisG, cwp2Δ::HIS3</i>              |                                         |                    | -30.200 (±2.982)                 | -25.2 (±0.424)   |
| Quintuple mutant (5Δ)               | <b>MATa</b> <i>his3Δ0 leu2Δ0 met15Δ0 ura3Δ0 snq2Δ::KanMX, pdr5Δ::LEU2, cwp1Δ::hisG, cwp2Δ::HIS3, yap1Δ::hisG</i> |                                         |                    | -30.500 (±2.458)                 | -25.7 (±0.624)   |

<sup>a</sup>the applied yeast strains in present research were donated by lab of aquatic animal protein engineering, Institute of Hydrobiology, Chinese Academy of Sciences.

<sup>b</sup>particles size of ZnO NPs was from Beijing Nachen S&T Ltd. <sup>c</sup>Both of hydrodiameter and zeta potential for nano and bulk ZnO at two time points expressed as average values with standard deviation from 6 replications.

<sup>a</sup>Institute of Hydrobiology, Chinese Academy of Sciences, Wuhan, 430072, China. Email: [fangt@ihb.ac.cn](mailto:fangt@ihb.ac.cn)

<sup>b</sup>Graduate University of Chinese Academy of Sciences, Beijing 100049, China

**Table S2. Toxicity data for ZnO NPs and CuO NPs as well as their bulk counterpart and salt to different organisms were from literatures.**

| Organism                                            | Exposure duration | NPs size (nm) |     | E(L)C <sub>50</sub> mg/L |       |                                      | E(L)C <sub>50</sub> mg/L |       |                   | $T_e^{\text{particle}}$ |       | $T_e^{\text{ion}}$ |       | $\log T_e^{\text{particle}}$ |      | $\log T_e^{\text{ion}}$ |       |
|-----------------------------------------------------|-------------------|---------------|-----|--------------------------|-------|--------------------------------------|--------------------------|-------|-------------------|-------------------------|-------|--------------------|-------|------------------------------|------|-------------------------|-------|
|                                                     |                   | ZnO           | CuO | n ZnO                    | b ZnO | ZnSO <sub>4</sub> ·7H <sub>2</sub> O | n CuO                    | b CuO | CuSO <sub>4</sub> | ZnO                     | CuO   | ZnO                | CuO   | ZnO                          | CuO  | ZnO                     | CuO   |
| <i>Saccharomyces cerevisiae</i> <sup>1</sup>        | 8 h               | 50-70         | 30  | 121                      | 134   | 331                                  | 21.6                     | 2031  | 28.6              | 1.11                    | 94.03 | 2.74               | 1.32  | 0.05                         | 1.97 | 0.44                    | 0.12  |
| <i>Vibrio fischeri</i> <sup>2</sup>                 | 0.5 h             | 50-70         | 30  | 1.9                      | 1.8   | 1.1                                  | 79                       | 3811  | 1.6               | 0.95                    | 48.24 | 0.58               | 0.02  | -0.02                        | 1.68 | -0.24                   | -1.70 |
| <i>Daphnia magna</i> <sup>2</sup>                   | 48 h              | 50-70         | 30  | 3.2                      | 8.8   | 6.1                                  | 3.2                      | 164.8 | 0.17              | 2.75                    | 51.50 | 1.91               | 0.05  | 0.44                         | 1.71 | 0.28                    | -1.30 |
| <i>Thamnocephalus platyurus</i> <sup>2</sup>        | 24 h              | 50-70         | 30  | 0.18                     | 0.24  | 0.98                                 | 2.1                      | 94.5  | 0.11              | 1.33                    | 45.00 | 5.44               | 0.05  | 0.12                         | 1.65 | 0.74                    | -1.30 |
| <i>Tetraphymena thermophile</i> <sup>3</sup>        | 24 h              | 50-70         | 30  | 6.8                      | 7.4   | 6.7                                  | 97.9                     | 1966  | 1.4               | 1.09                    | 20.08 | 0.99               | 0.014 | 0.04                         | 1.30 | 0.00                    | -1.85 |
| <i>Pseudokirchneriella subcapitata</i> <sup>4</sup> | 96 h              | 50-70         | 30  | 0.042                    | 0.037 | 0.042                                | 0.71                     | 11.55 | 0.02              | 0.88                    | 16.27 | 1.00               | 0.03  | -0.06                        | 1.21 | 0.00                    | -1.52 |

$T_e^{\text{particle}}$  and  $T_e^{\text{ion}}$  were calculated through equation 4 and 5.

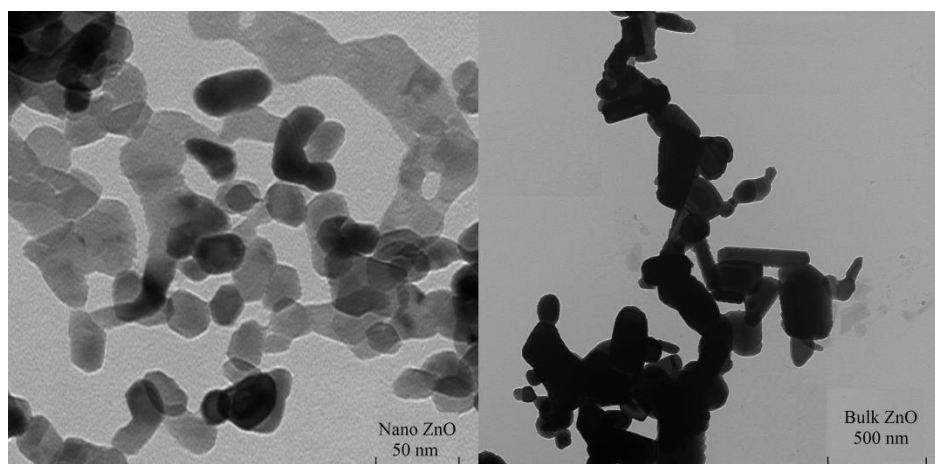

**Figure S1** TEM images of nano and bulk ZnO (10 mg/L) in Deionized-water.

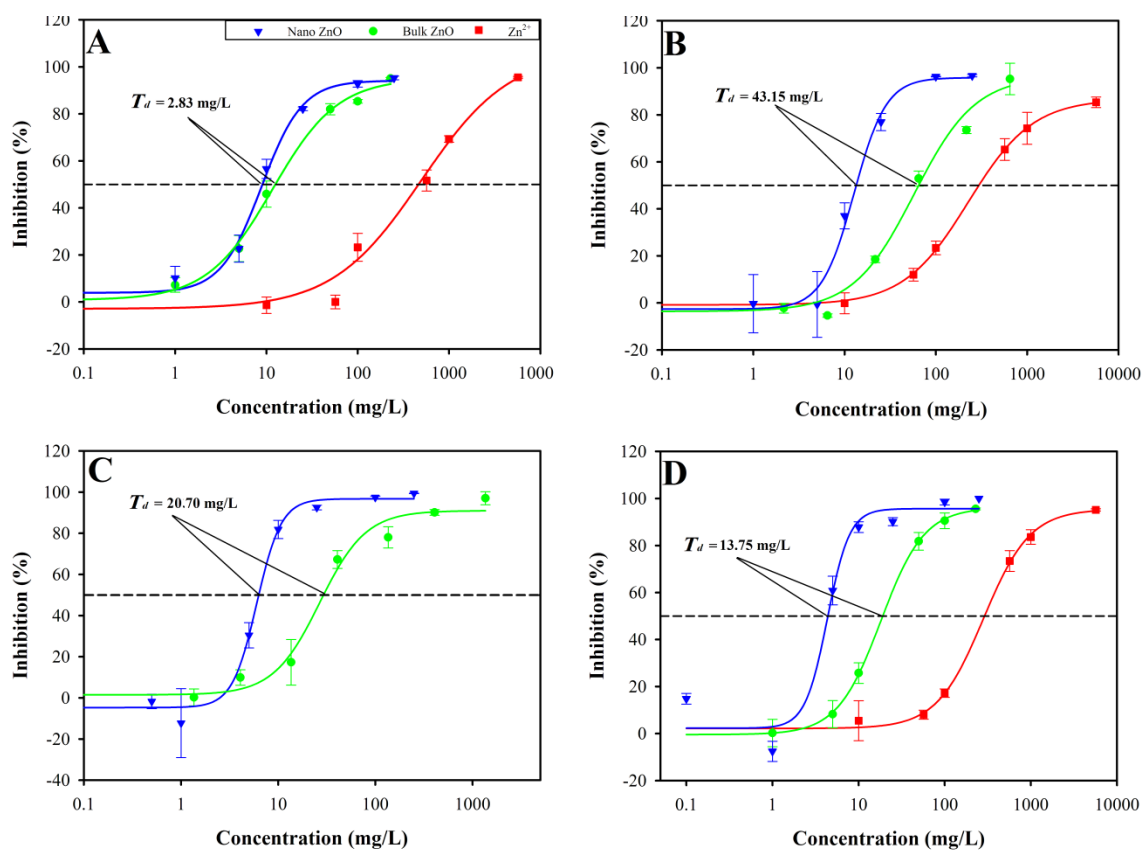

**Figure S2** The cytotoxicity of ZnO NPs, bulk ZnO and zinc salt to yeast strains. A: BY4741; B: *yap1* $\Delta$ ; C: 4 $\Delta$ ; D: 5 $\Delta$ .  $T_d$  for each strain was calculated by equation 3.

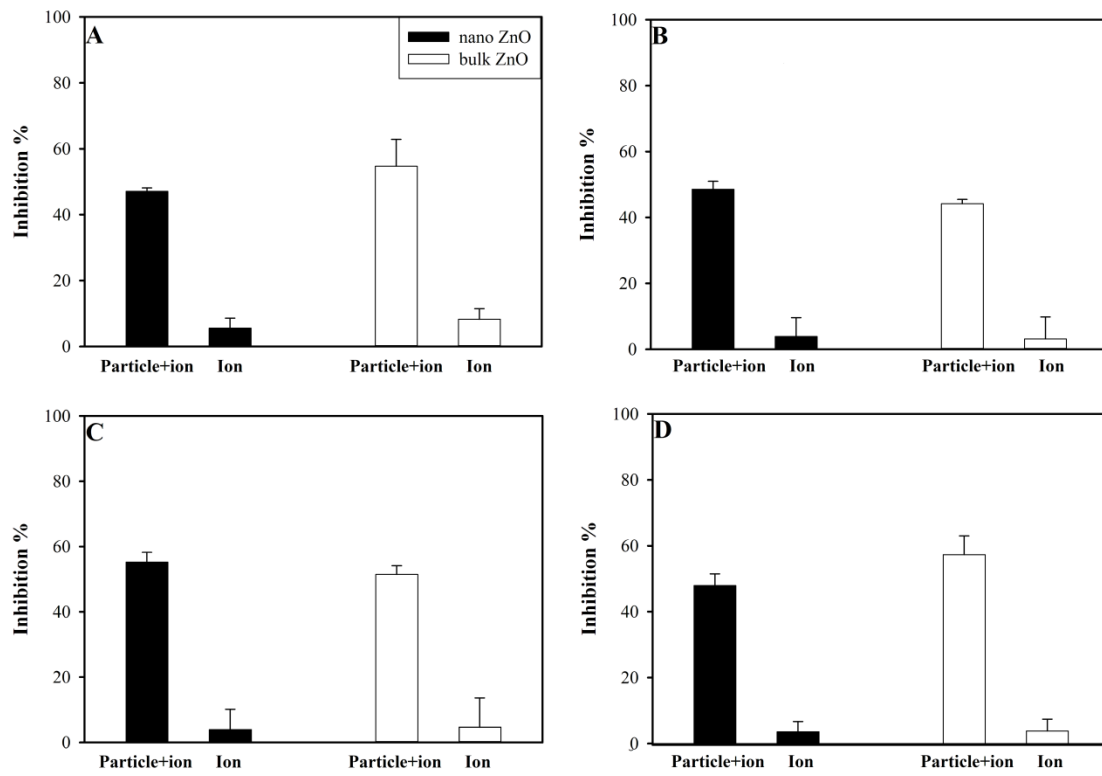

**Figure S3** Inhibition caused by calculated EC50 of ZnO (nano and bulk) particles and its correspondingly released Zn<sup>2+</sup> to yeast and mutants. A: BY4741; B: *yap1*Δ; C: 4Δ; D: 5Δ. n = 3, from three independent experiments.

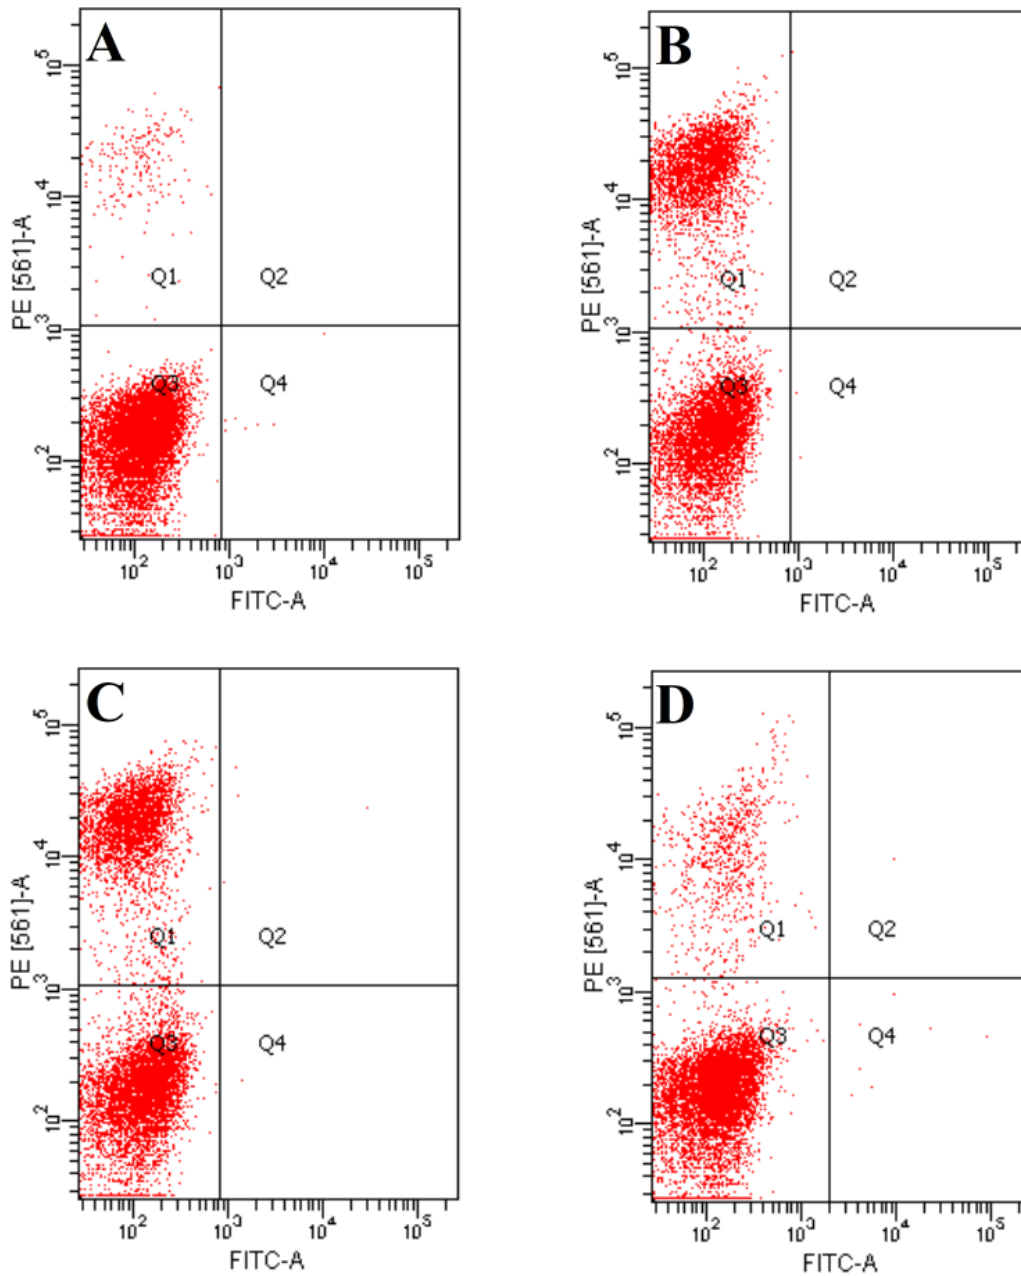

**Figure S4** The apoptosis experiments were conducted using double dye Annexin V-FITC/ PI to wild type yeast. A: Blank (0 mg/L of ZnO NPs), B: Treatment 1 (5 mg/L of ZnO NPs), C: Treatment 2 (5 mg/L of bulk ZnO), D: Treatment 4 (5 mg/L of  $Zn^{2+}$ ). Q1 region denotes the cell dyed by PI, Q4 region denotes the cell dyed by Annexin V-FITC, and Q2 region denotes the cell dyed by both Annexin V-FITC and PI.

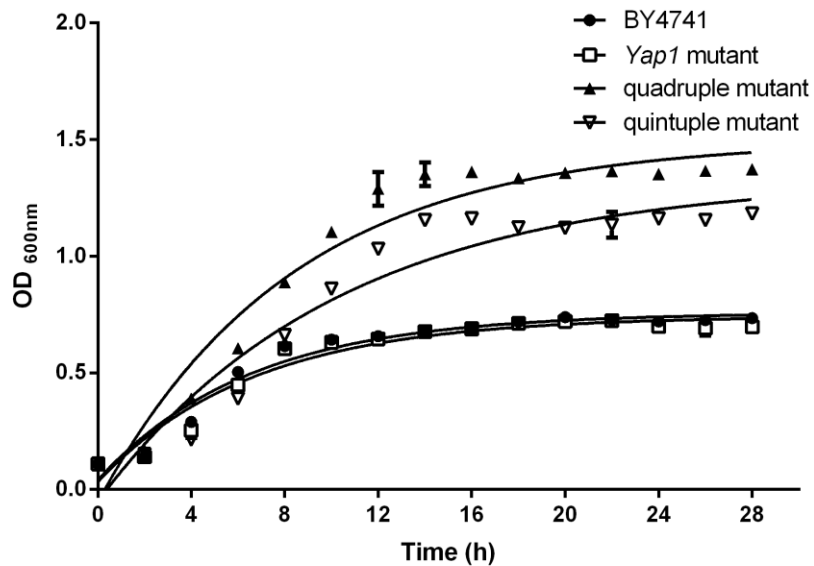

**Figure S5** The Yeast *Saccharomyces cerevisiae* wild-type BY4741 and mutants' growth in SD medium at 30 °C with 200 rpm continuous shaking during 28 h.<sup>5</sup>

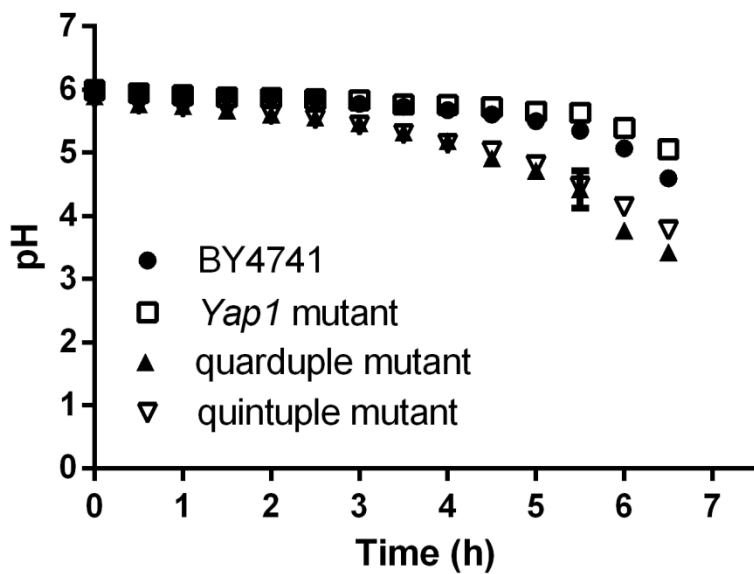

**Figure S5** Dynamic variation of pH values in the SD medium over time in the presences of yeast wild-type and mutants. Data are means  $\pm$  standard error of 3 independent replicates.<sup>5</sup>

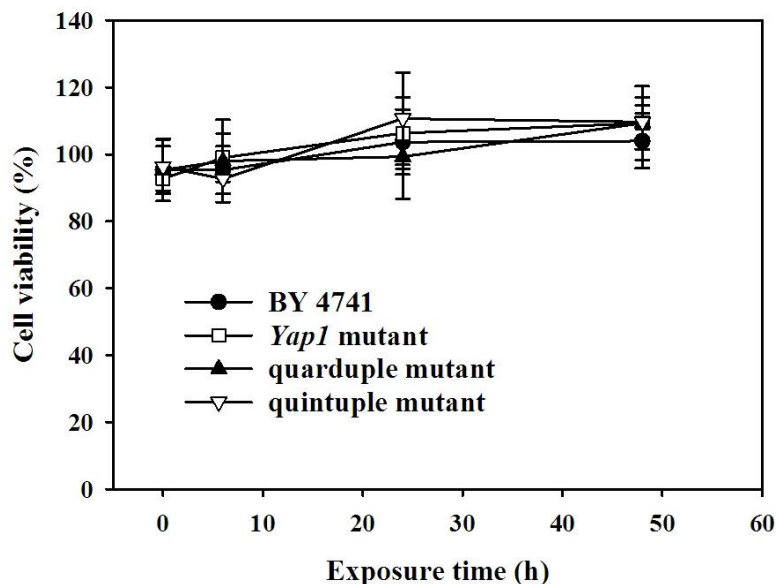

**Figure S7** The cell viability of yeast strains under non-stress condition at different exposure time. Data are means  $\pm$  standard error of 3 independent replicates. The increased cell viability (> 100%) at 24 and 48 h could be explained by the volatilization of deionized water during the exposure duration.

#### Reference:

1. Kasemets, K.; Ivask, A.; Dubourguier, H.-C.; Kahru, A., Toxicity of nanoparticles of ZnO, CuO and TiO<sub>2</sub> to yeast *Saccharomyces cerevisiae*. *Toxicology in Vitro* **2009**, *23* (6), 1116-1122.
2. Heinlaan, M.; Ivask, A.; Blinova, I.; Dubourguier, H.-C.; Kahru, A., Toxicity of nanosized and bulk ZnO, CuO and TiO<sub>2</sub> to bacteria *Vibrio fischeri* and crustaceans *Daphnia magna* and *Thamnocephalus platyurus*. *Chemosphere* **2008**, *71* (7), 1308-1316.
3. Mortimer, M.; Kasemets, K.; Kahru, A., Toxicity of ZnO and CuO nanoparticles to ciliated protozoa *Tetrahymena thermophila*. *Toxicology* **2010**, *269* (2-3), 182-189.
4. Aruoja, V.; Dubourguier, H.-C.; Kasemets, K.; Kahru, A., Toxicity of nanoparticles of CuO, ZnO and TiO<sub>2</sub> to microalgae *Pseudokirchneriella subcapitata*. *Science of The Total Environment* **2009**, *407* (4), 1461-1468.
5. Bao, S.; Lu, Q.; Fang, T.; Dai, H.; Zhang, C., An assessment of the toxicity of CuO nanoparticles using multiple-gene-deleted mutants of *Saccharomyces cerevisiae*. *Applied and Environmental Microbiology* **2015**.
